# Supplementary material for: Synthesis of CuS nanoplate-containing PDMS film with excellent near-infrared shielding properties
Source: Royal Society of Chemistry journal article supplement (doi:10.1039/c5ra22611b), 2016-01-01
Supplement: c5ra22611b1.pdf [file c5ra22611b1.pdf]

## Supporting Information for

### Synthesis of CuS nanoplates-contained PDMS film with excellent near-infrared shielding property

Wenjun Zhong,<sup>a</sup> Nuo Yu,<sup>a</sup> Lisha Zhang,<sup>\*b</sup> Zixiao Liu,<sup>a</sup> Zhaojie Wang,<sup>a</sup> Junqing Hu,<sup>a</sup> and  
Zhigang Chen<sup>\*a</sup>

#### The determination of photothermal conversion efficiency of CuS nanoplates

The photothermal conversion efficiency of CuS nanoplates was measured by a classic solution method developed by Roper et al in 2007.<sup>1</sup> We heat the aqueous dispersion containing CuS nanoplates (0.25 mg mL<sup>-1</sup>) by 980 nm laser (0.5 W cm<sup>-2</sup>) irradiation, until a steady state temperature was reached (Fig. S1). The highest temperature elevation was determined to be 22.3 °C at about 720 s. Subsequently, the laser was completely shut off, and the aqueous dispersion containing CuS nanoplates cools down naturally to environmental temperature. The photothermal conversion efficiency ( $\eta_T$ ) can be calculated by using the equation (1):

$$\eta_T = \frac{hS(T_{Max} - T_{Surr}) - Q_{Dis}}{P(1 - 10^{-A_{980}})} \quad (1)$$

where  $T_{Max}$  is the equilibrium maximum temperature of the dispersion and  $T_{Surr}$  is the ambient temperature (26.0 °C), and the value ( $T_{Max} - T_{Surr}$ ) was 22.3 °C (Fig. S1).  $P$  is the power of incident laser, and herein it is 0.125 W. In addition,  $A_{980}$  is the absorbance of aqueous dispersion of CuS nanoplates (0.25 mg mL<sup>-1</sup>) at wavelength 980 nm which

---

<sup>a</sup>State Key Laboratory for Modification of Chemical Fibers and Polymer Materials, College of Materials Science and Engineering, Donghua University, Shanghai 201620, China. E-mail: [zgchen@dhu.edu.cn](mailto:zgchen@dhu.edu.cn)

<sup>b</sup>College of Environmental Science and Engineering, Donghua University, Shanghai 201620, China. E-mail: [lszhang@dhu.edu.cn](mailto:lszhang@dhu.edu.cn)

should match the irradiated depth of solution, and it can be determined to be 0.8.  $h$  is the heat transfer coefficient,  $S$  is the surface area of the container. The value of  $hS$  is calculated by the equation (2):

$$\tau_s = \frac{\sum_i m_i C_{p,i}}{hS} \quad (2)$$

where  $\tau_s$  is the system time constant which can be determined by the slope of the linear fitting between cooling time ( $t$ ) and negative natural logarithm of driving force temperature ( $-\ln\theta$ ), as shown in (Fig. S2). In our experiment  $\tau_s$  is 356.4 s.  $m_i$  and  $C_{p,i}$  represent the mass and heat capacity of system components (photothermal agent, solvent, quartz sample cell and so on)

and  $\sum_i m_i C_{p,i}$  was determined to be 0.838 J °C<sup>-1</sup>. Herein, the value of  $hS$  can be calculated to be 0.00235 W °C<sup>-1</sup> in the present case.  $Q_{Dis}$  represents the heat dissipated from light absorbed by the quartz sample cell and solvent, it can be measured to be 0.0247 W by independently using the same sample cell containing pure water under the other identical conditions. Substituting all these data into equation (1), the photothermal conversion efficiency ( $\eta_T$ ) can be calculated to be 26.4 %.

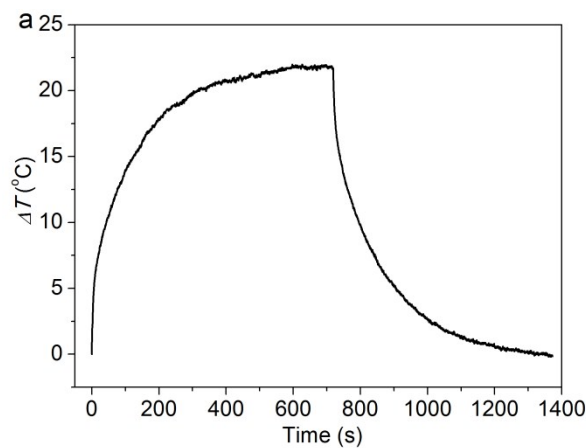

**Fig. S1** Temperature elevation of aqueous dispersion of CuS nanoplates (0.25 mg mL<sup>-1</sup>) as a function of the time, under the irradiation of 980 nm laser with the intensity of 0.5 W cm<sup>-2</sup>.

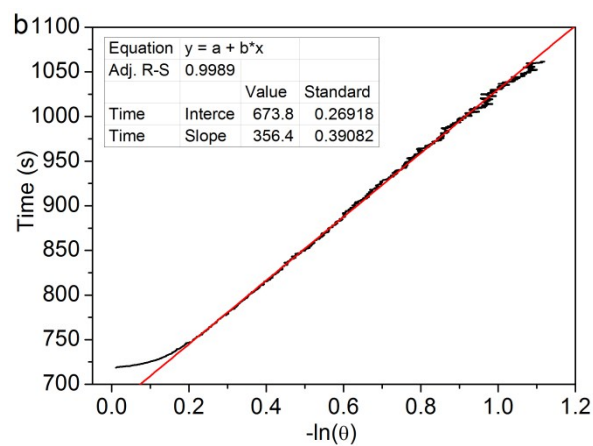

**Fig. S2** Linear fitting of the function between time and negative natural logarithm of driving force temperature ( $-\ln\theta$ ) of CuS aqueous solution, corresponding to the cooling period of Fig.S1.

### Notes and references

1. D. K. Roper, W. Ahn and M. Hoepfner, *J. Phys. Chem. C*, 2007, **111**, 3636-3641.
